# Supplementary material for: An SMC-like protein binds and regulates Caenorhabditis elegans condensins
Source: PubMed Central journal article supplement (PMC5373644; doi:10.1371/journal.pgen.1006614), 2017-03-16

**A**

| genotype                                         | <i>dpy-27(tm3326)</i> | <i>dpy-26(tm3432)</i> | <i>kle-2(ok1151)</i>                                     |
|--------------------------------------------------|-----------------------|-----------------------|----------------------------------------------------------|
| <i>m+z-</i> mutant                               | dumpy                 | dumpy                 | germline-less, sterile, uncoordinated, protruding vulvae |
| <i>m-z-</i> mutant                               | dumpy; sterile        | dumpy; sterile        | n/a                                                      |
| <i>m-z-</i> mutant; <i>map</i> -tagged transgene | appear wild-type      | appear wild-type      | appear wild-type, but temperature-sensitive              |

**B**

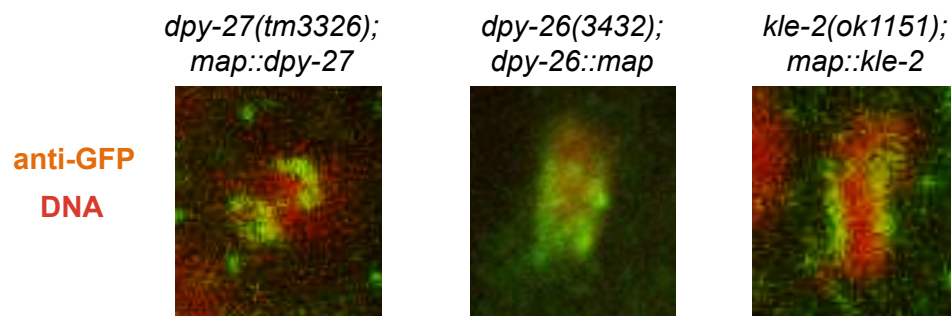

**C**

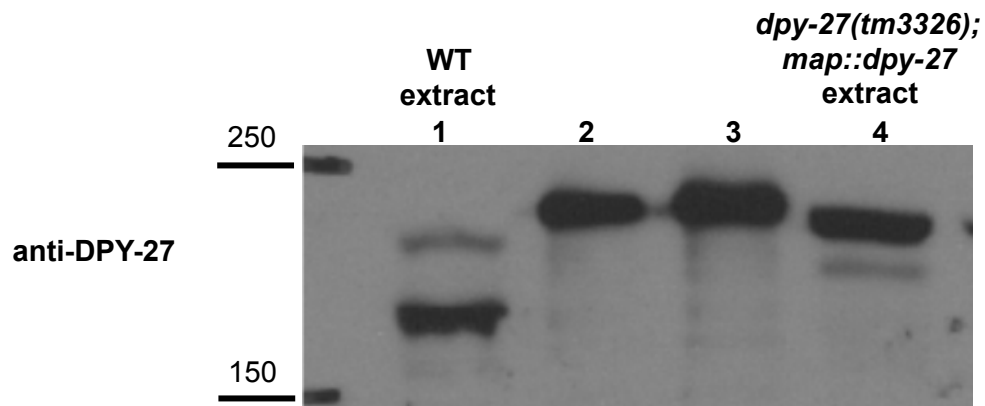

Supplement: pgen.1006614.s001.pdf [file pgen.1006614.s001.pdf]
