# Supplementary material for: An SMC-like protein binds and regulates Caenorhabditis elegans condensins
Source: PubMed Central journal article supplement (PMC5373644; doi:10.1371/journal.pgen.1006614), 2017-03-16

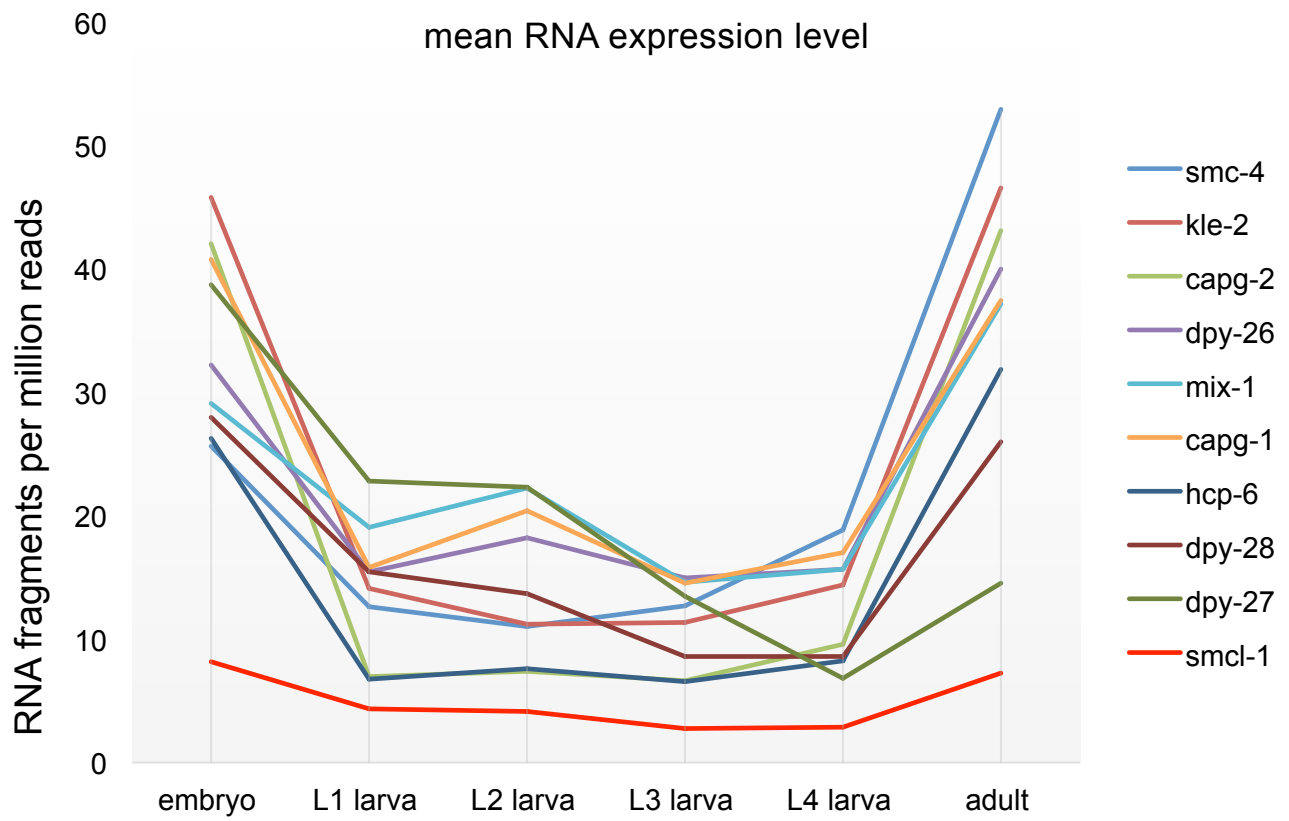

Supplement: pgen.1006614.s002.pdf [file pgen.1006614.s002.pdf]
