# Supplementary material for: An SMC-like protein binds and regulates Caenorhabditis elegans condensins
Source: PubMed Central journal article supplement (PMC5373644; doi:10.1371/journal.pgen.1006614), 2017-03-16
Supplement: pgen.1006614.s003.pdf [file pgen.1006614.s003.pdf]

| <b>SMCL-1-like proteins</b> | <b>length</b>    | <b>coiled coils</b> | <b>SMC hinge</b> | <b>Walker A<br/>GxxGxGK(S/T)</b> | <b>Signature motif<br/>LSGG(E/Q)(K/R)</b> | <b>Walker B<br/>hhhhDE</b> |
|-----------------------------|------------------|---------------------|------------------|----------------------------------|-------------------------------------------|----------------------------|
| <b>typical SMCs</b>         | <b>1000-1500</b> | <b>yes</b>          | <b>yes</b>       | <b>+++++++</b>                   | <b>+++++</b>                              | <b>+++++</b>               |
| <b>SMCL-1, C44C10.4</b>     | <b>537</b>       | <b>no</b>           | <b>no</b>        | <b>+++++++</b>                   | <b>FH++S+</b>                             | <b>+++++D</b>              |
| CBG10266                    | 639              | no                  | no               | +++A++++                         | F+++++                                    | +++++N                     |
| CBG10265                    | 305              | no                  | no               | +++S++++                         | F+++++                                    | +++++N                     |
| CRE07623                    | 334              | no                  | no               | +++++++                          | +++++                                     | +++++N                     |
| CRE07629                    | 347              | no                  | no               | +++++++                          | +++++S                                    | +++++D                     |
| CBN26183                    | 520              | no                  | no               | +++++++                          | MY+++Q                                    | +++++D                     |
| CBN16092                    | 529              | yes                 | no               | +++++++                          | +++++                                     | +++++S                     |
| CBN08369                    | 393              | no                  | no               | S++A++++                         | V+++++                                    | +++++N                     |
| CBN06071                    | 544              | no                  | no               | S+++++++                         | +++++                                     | +++++N                     |
| Csp11_scaffold_629.g8681    | 525              | yes                 | no               | +++++++                          | +++++                                     | +++++N                     |
| Csp5_scaffold_04032.g31882  | 330              | no                  | no               | +++++++                          |                                           |                            |
| Csp5_scaffold_04032.g31881  | 336              |                     |                  |                                  | MG++++                                    | +++++N                     |
