# Supplementary material for: An SMC-like protein binds and regulates Caenorhabditis elegans condensins
Source: PubMed Central journal article supplement (PMC5373644; doi:10.1371/journal.pgen.1006614), 2017-03-16
Supplement: pgen.1006614.s005.pdf [file pgen.1006614.s005.pdf]

**A**

| Phenotype                                                  | Genotype           |                                |
|------------------------------------------------------------|--------------------|--------------------------------|
|                                                            | <i>hcp-6(mr17)</i> | <i>hcp-6(mr17) ; smcl-1(0)</i> |
| Average brood size per worm<br>(shift L1 to 21.5°C)        | 17                 | 20                             |
| Average brood size per worm<br>(shift young adult to 25°C) | 145                | 143                            |
| Embryo to L1 hatch rate<br>(shift young embryos to 21.5°C) | 7%                 | 7%                             |

**B**

| Phenotype                                | Genotype            |                                |
|------------------------------------------|---------------------|--------------------------------|
|                                          | <i>dpy-21(e428)</i> | <i>dpy-21(e428); smcl-1(0)</i> |
| Average viable adult progeny<br>per worm | 156                 | 142                            |
